# Supplementary material for: Palliative Care for Hospitalized Patients With Stroke: Results From the 2010 to 2012 National Inpatient Sample
Source: PubMed Central journal article supplement (PMC5571885; doi:10.1161/strokeaha.117.016893), 2017-08-17
Supplement: str-48-2534-s001.pdf [file str-48-2534-s001.pdf]

# ONLINE SUPPLEMENT

Palliative care for hospitalized stroke patients: results from the 2010-2012 National Inpatient Sample

## Supplemental Tables

**TABLE I: Trends in Palliative care utilization.**

| <b>Year</b>                                        | <b>2010</b>      | <b>2011</b>      | <b>2012</b>      |
|----------------------------------------------------|------------------|------------------|------------------|
| <b>Number of hospitals</b>                         | 1001             | 990              | 3829             |
| <b>Total number of stroke admissions</b>           | 130,418          | 137,846          | 127,230          |
| <b>In-hospital deaths (% of stroke admissions)</b> | 12,773<br>(9.8%) | 12,314<br>(8.9%) | 11,310<br>(8.9%) |
| <b>Total number of admissions receiving PCE</b>    | 7,061            | 8,810            | 8,773            |
| <b>In-hospital stroke deaths receiving PCE (%)</b> | 32.7%            | 37.9%            | 42.0%            |
| <b>PCE per stroke admission (%)</b>                | 5.4%             | 6.3%             | 6.9%             |

**Table II: Discharge characteristics. All p < 0.01.**

| Discharge characteristics                                                | No Palliative Care | Palliative Care |
|--------------------------------------------------------------------------|--------------------|-----------------|
|                                                                          | n (%)              | n (%)           |
| <b>Discharge Status (all patients, 2010-2012)</b>                        |                    |                 |
| Alive at Discharge                                                       | 347,782 (93.87)    | 10,933 (44.39)  |
| Died in Hospital                                                         | 22,700 (6.13)      | 13,697 (55.61)  |
| <b>Discharge Status (only patients with discharge status, 2010-2011)</b> |                    |                 |
| Alive at Discharge except hospice                                        | 199,955 (90.05)    | 1,932 (14.16)   |
| Died in Hospital                                                         | 14,436 (6.50)      | 7,799 (57.20)   |
| Discharged to hospice                                                    | 7,648 (3.45)       | 3,904 (28.64)   |
| <b>Discharge Disposition (2010-2011)</b>                                 |                    |                 |
| Routine                                                                  | 72,254 (32.54)     | 246 (1.80)      |
| Skilled Nursing Facility (SNF)                                           | 44,218 (19.91)     | 1,198 (8.79)    |
| Home Health Care                                                         | 25,283 (11.39)     | 113 (0.83)      |
| Rehab facility                                                           | 39,462 (17.77)     | 79 (0.58)       |
| Short-term hospital                                                      | 6,631 (2.99)       | 69 (0.51)       |
| Expired in hospital                                                      | 14,376 (6.47)      | 7,666 (56.22)   |
| Died in a medical facility                                               | 90 (0.04)          | 133 (0.09)      |
| Hospice--Home                                                            | 2,287 (1.03)       | 1,132 (8.30)    |
| Hospice--Medical                                                         | 5,361 (2.41)       | 2,772 (20.33)   |
| Others                                                                   | 12,077 (5.45)      | 348 (2.55)      |
